# Supplementary material for: Combination therapy of infliximab and thiopurines, but not monotherapy with infliximab or vedolizumab, is associated with attenuated IgA and neutralisation responses to SARS-CoV-2 in inflammatory bowel disease
Source: HighWire-hosted journal article supplement (doi:10.1136/gutjnl-2021-326312), 2021-12-15
Supplement: gutjnl-2021-326312supp002_data_supplement.pdf [file gutjnl-2021-326312supp002_data_supplement.pdf]

|               | IFX           | IFX + thiopurines | VDZ           | Healthy control group (used in MSD assay) | Healthy control group (used in ELISA and neutralisation assay) |
|---------------|---------------|-------------------|---------------|-------------------------------------------|----------------------------------------------------------------|
| Number        | 13            | 15                | 27            | 80                                        | 36                                                             |
| Mean age (SD) | 30.41 (17.29) | 25.31 (15.89)     | 41.21 (17.62) | 39.76 (11.66)                             | 41.33 (12.91)                                                  |
| Male (%)      | 2 (15.4)      | 7 (46.7)          | 9 (33.3)      | 19 (23.8)                                 | 29 (80.6)                                                      |
| CD (%)        | 9 (69.2)      | 11 (73.3)         | 8 (30.8)      | 0 (0.0)                                   | 0 (0.0)                                                        |
| IBD-U (%)     | 0 (0.0)       | 0 (0.0)           | 1 (3.8)       | 0 (0.0)                                   | 0 (0.0)                                                        |
| UC (%)        | 4 (30.8)      | 4 (26.7)          | 17 (65.4)     | 0 (0.0)                                   | 0 (0.0)                                                        |
